# Supplementary material for: Lithium as a rescue therapy for regression and catatonia features in two SHANK3 patients with autism spectrum disorder: case reports
Source: Springer Nature journal article supplement (doi:10.1186/s12888-015-0490-1), 2015-05-06
Supplement: MOESM1 [file 9747914]

**CARE CHECKLIST of information to include when writing a case report**

| Section                         | Item | Checklist item description                                                                                                      | Reported on page   |
|---------------------------------|------|---------------------------------------------------------------------------------------------------------------------------------|--------------------|
| <b>Title</b>                    | 1    | The words “case report” and the area of focus should appear in the title (such as diabetes, a therapeutic approach, an outcome) | P 1                |
| <b>Key Words</b>                | 2    | 2 to 5 key words that identify areas covered in this case report                                                                | P 3                |
| <b>Abstract</b>                 | 3a   | Introduction—What is unique about this case? What does it add to the medical literature? Why is this important?                 | P4                 |
|                                 | 3b   | The patient's main concerns and important clinical findings                                                                     | P 3                |
|                                 | 3c   | The main diagnoses, therapeutics interventions, and outcomes                                                                    | P 2,3              |
|                                 | 3d   | Conclusion—What are the “take-away” lessons from this case?                                                                     | P 3                |
| <b>Introduction</b>             | 4    | One or two paragraphs summarizing why this case is unique with reference to the relevant medical literature                     | P 4                |
| <b>Patient Information</b>      | 5a   | De-identified demographic and other patient specific information                                                                | P 4,6              |
|                                 | 5b   | Main concerns and symptoms of the patient                                                                                       | Fig. 1, 2, 3 and 4 |
|                                 | 5c   | Medical, family, and psychosocial history including relevant genetic information (this should also appear in the timeline)      | P 4,5,6,7          |
|                                 | 5d   | Relevant past interventions and their outcomes                                                                                  | P 5,7              |
| <b>Clinical Findings</b>        | 6    | Describe the relevant physical examination (PE) and other significant clinical findings                                         | P 4,6              |
| <b>Timeline</b>                 | 7    | Relevant data from the patient's history organized as a timeline                                                                | Fig. 2,4           |
| <b>Diagnostic Assessment</b>    | 8a   | Diagnostic methods (PE, laboratory testing, imaging, surveys)                                                                   | P 5,7              |
|                                 | 8b   | Diagnostic challenges (access, financial, cultural)                                                                             | P 3                |
|                                 | 8c   | Diagnostic reasoning including other diagnoses considered                                                                       | P 6,8              |
|                                 | 8d   | Prognostic characteristics when applicable (staging)                                                                            | P 6                |
| <b>Therapeutic Intervention</b> | 9a   | Types of intervention (pharmacologic, surgical, preventive)                                                                     | P 6,8              |
|                                 | 9b   | Administration of intervention (dosage, strength, duration)                                                                     | P 6,8              |
|                                 | 9c   | Any changes in the interventions (with rationale)                                                                               | P 6,8              |
| <b>Follow-up and Outcomes</b>   | 10a  | Clinician and patient-assessed outcomes (when appropriate)                                                                      | Fig. 2,4           |
|                                 | 10b  | Important follow-up diagnostic and other test results                                                                           | Fig 1, 2, 3 and 4  |
|                                 | 10c  | Intervention adherence and tolerability (how was this assessed)                                                                 | Fig. 1 and 3       |
|                                 | 10d  | Adverse and unanticipated events                                                                                                | P 6,8              |
| <b>Discussion</b>               | 11a  | Strengths and limitations in your approach to this case                                                                         | p 9                |
|                                 | 11b  | Discussion of the relevant medical literature                                                                                   | p 8-9              |
|                                 | 11c  | The rationale for your conclusions (a causality assessment)                                                                     | Fig. 2 and 4       |
|                                 | 11d  | The primary “take-away” lessons from this case report                                                                           | p 9                |
| <b>Patient Perspective</b>      | 12   | When appropriate the patient should share their perspective on the treatments they received                                     | P 9                |

|                         |    |                                                                    |     |
|-------------------------|----|--------------------------------------------------------------------|-----|
| <b>Informed Consent</b> | 13 | Did the patient give informed consent? Please provide if requested | Yes |
|-------------------------|----|--------------------------------------------------------------------|-----|

---
