# Supplementary material for: Lithium as a rescue therapy for regression and catatonia features in two SHANK3 patients with autism spectrum disorder: case reports
Source: Springer Nature journal article supplement (doi:10.1186/s12888-015-0490-1), 2015-05-06

**Patient 1**

Years

6

13

15

19

21

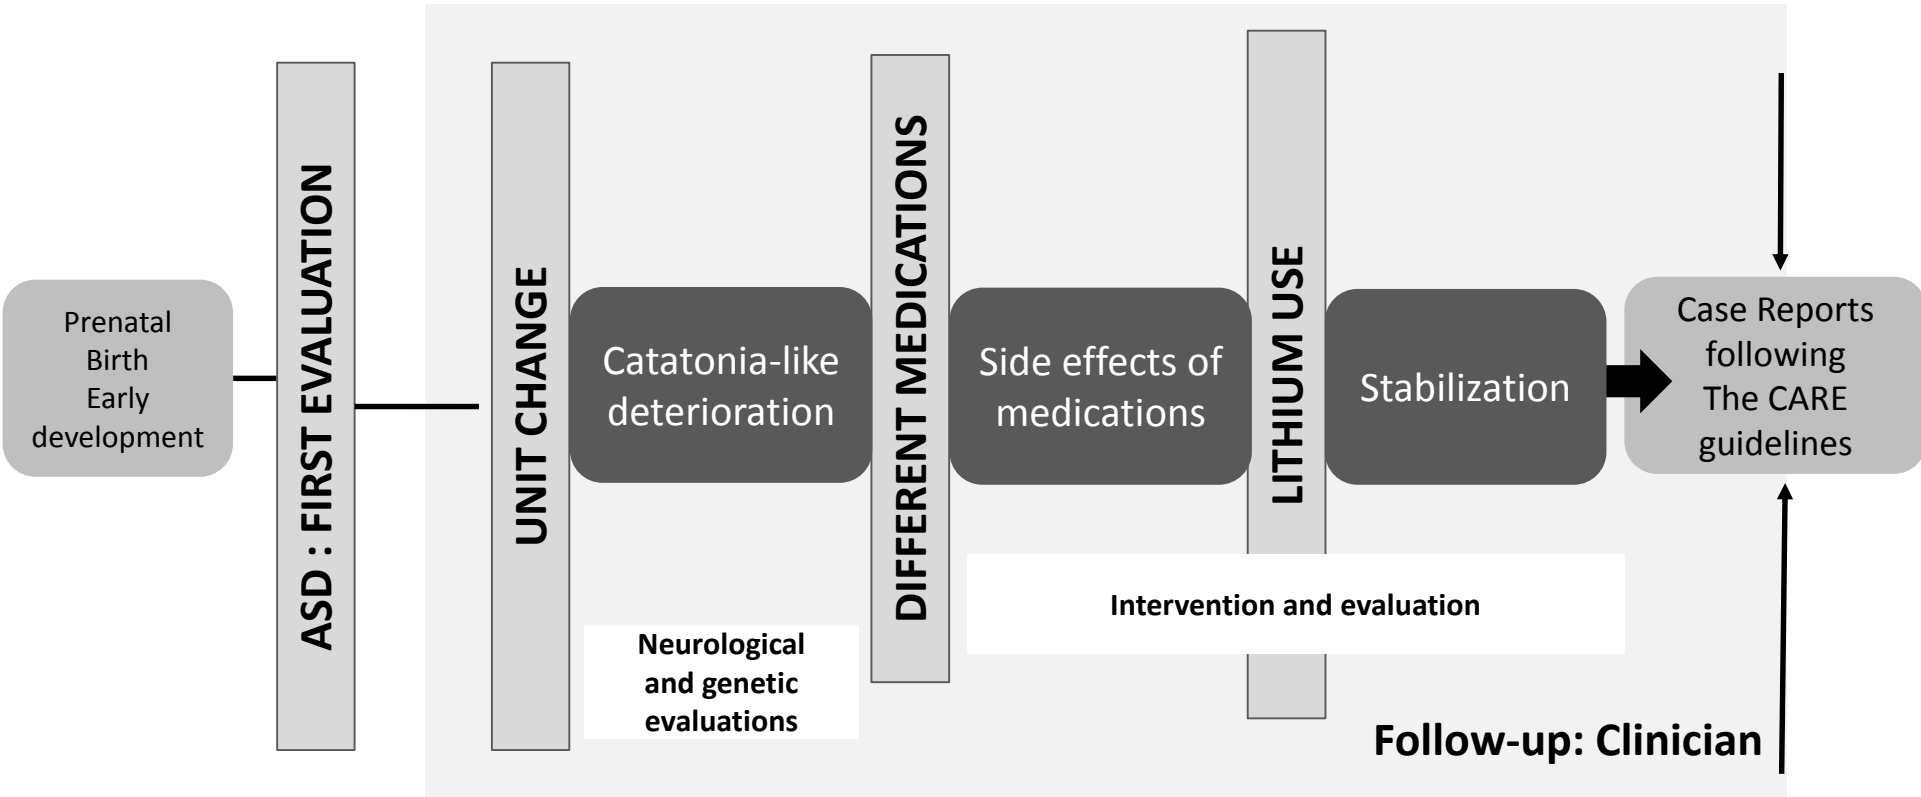

**Patient 2**

Years

9

13

15

16

17

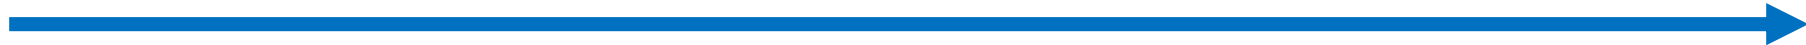

Supplement: MOESM2 [file 9747914]
